# Supplementary material
Source: PubMed Central journal article supplement (PMC3243660)
Supplement: tlo0406_0365SD1.pdf [file tlo0406_0365SD1.pdf]

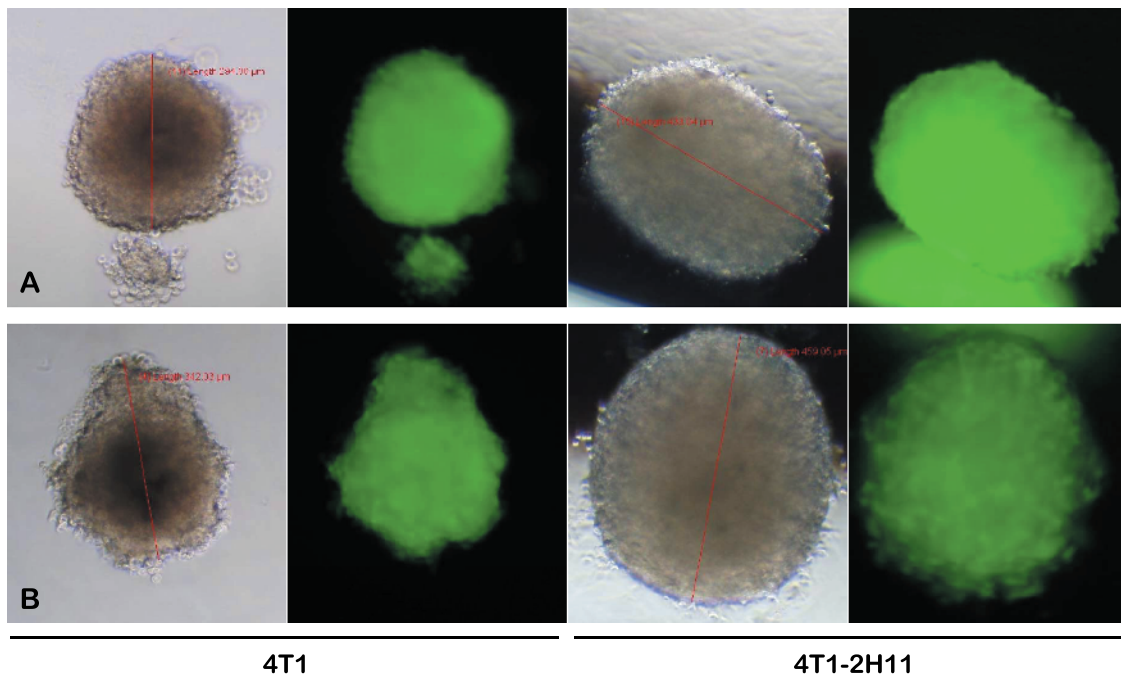

**Figure W1.** Spheroids at day 6 after addition of 200 (A) and 2000 (B) 4T1 tumor or 2H11 endothelial cells to the existing 4T1 hanging drop culture.
